# Supplementary material
Source: Springer Nature journal article supplement (https://www.springermedizin.de/resource/supplementary/13012_2012_524_MOESM1_ESM.pdf/9629974)
Supplement: MOESM1 [file 9629974]

**Objective/Step 1:** Select and define the intervention techniques

```
graph TD; A[Objective/Step 1: Select and define the intervention techniques] --> B[Objective/Step 2: Operationalise the techniques and decide on their delivery]; B --> C[Objective/Step 3: Formulate hypotheses about the mechanisms of change];
```

**Objective/Step 2:** Operationalise the techniques and decide on their delivery

**Objective/Step 3:** Formulate hypotheses about the mechanisms of change
